# Supplementary material
Source: PubMed Central journal article supplement (PMC5690378)
Supplement: supp_fj.201700236R_Supplemental_Figure1.pdf [file supp_fj.201700236R_Supplemental_Figure1.pdf]

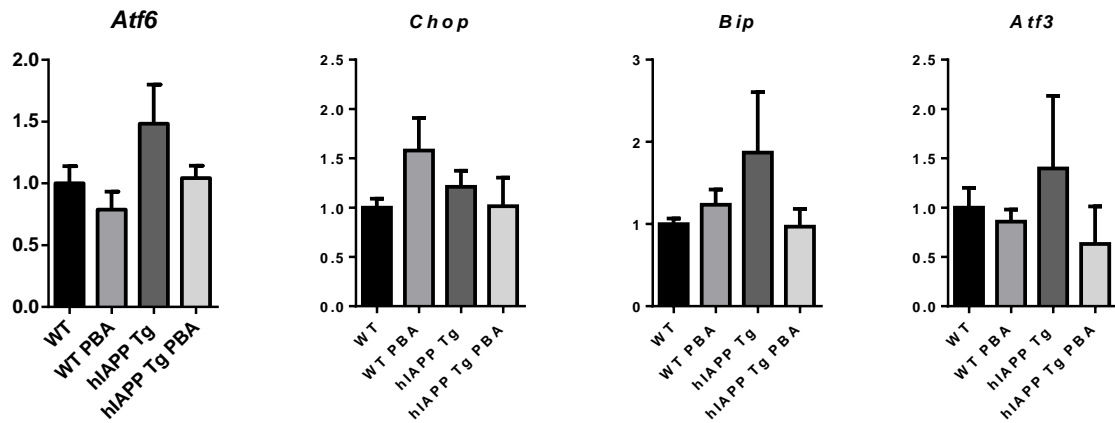

**Supplemental Fig. 1. Quantification of mRNA relative levels of ER stress-related genes.** Wild type and hIAPP Tg mice were left untreated or treated with PBA dissolved in water for 12 weeks. Gene expression levels of isolated islets were determined after sacrifice and normalized to *Tbp1* and *Hprt*. Results are expressed as mean  $\pm$  SEM of 4-5 mice per group from 2 independent experiments.
