# Supplementary material
Source: PubMed Central journal article supplement (PMC5690378)
Supplement: supp_fj.201700236R_Supplemental_Figure2.pdf [file supp_fj.201700236R_Supplemental_Figure2.pdf]

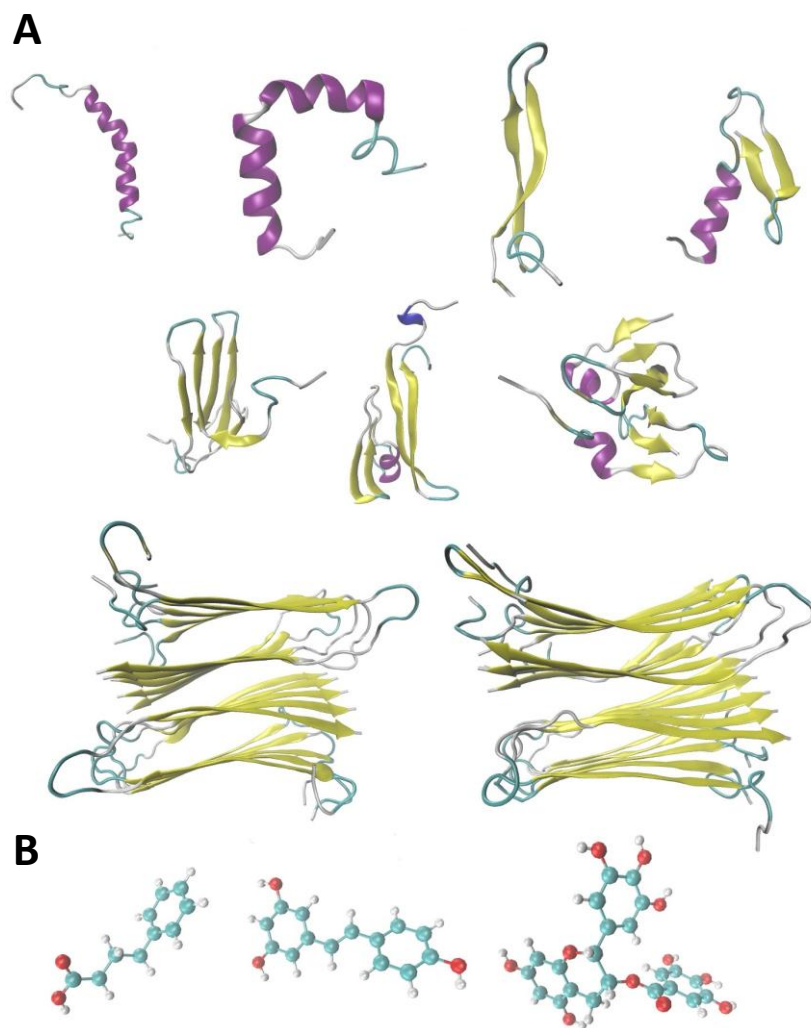

**Supplemental Fig. 2. Crystal structures used for the *in silico* analysis. (A)** hIAPP structures. Upper row from left to right: Monomer1, Monomer2, Monomer3, Monomer4. Middle row from left to right: Dimer1, Dimer2, Dimer3. Lower row from left to right: Oligomer1, Oligomer2. **(B)** Chemical structure of the employed molecules. From left to right: PBA, resveratrol and EGCG.
