# Supplementary material
Source: PubMed Central journal article supplement (PMC5690378)
Supplement: supp_fj.201700236R_Supplemental_Table1.pdf [file supp_fj.201700236R_Supplemental_Table1.pdf]

**Supplemental Table 1. List of primer sequences used in real-time PCR experiments.**

| <b>Gene</b>                   | <b>Forward</b>            | <b>Reverse</b>            |
|-------------------------------|---------------------------|---------------------------|
| <i>Atf3</i>                   | TCGGATGTCCTCTGCGCTGGA     | CTGACTCTTTCTGCAGGCACTCTGT |
| <i>Atf6</i>                   | CATTTCTGAAGGGATCATCTG     | GTCTTGTGGTCTTGTTGTG       |
| <i>Bip</i>                    | TGCAGCAGGACATCAAGTTC      | TACGCCTCAGCAGTCTCCTT      |
| <i>Cd68</i>                   | AAGGTAAAGCTAAAGTGGGGCT    | TGGACCTTGGTTTTGTTGGGA     |
| <i>Ccl2</i>                   | TTAAAAACCTGGATCGGAACCAA   | GCATTAGCTTCAGATTTACGGGT   |
| <i>Chop</i>                   | AAGATGAGCGGGTGGCAGCG      | GCACGTGGACCAGGTTCTGCT     |
| <i>Colla1</i>                 | GACATGTTTCAGCTTTGTGGACCTC | GGGACCCTTAGGCCATTGTGTA    |
| <i>Emr1</i>                   | GCCCTGAACATGCAACCTG       | CTCCTCCACTAGATTCAAGTCTT   |
| <i>Hprt</i>                   | GGTTAAGCAGTACAGCCCCA      | TCCAACACTTCGAGAGGTCC      |
| <i>Il-1<math>\beta</math></i> | GCAACTGTTCTGAACTCAACT     | ATCTTTTGGGGTCCGTCAACT     |
| <i>Lyz1</i>                   | TGGAATGGATGGCTACCGTG      | CCATAGTCGGTGCTTCGGTC      |
| <i>Tbp1</i>                   | ACCCTTCACCAATGACTCCTATG   | ATGATGACTGCAGCAAATCGC     |
| <i>Txnip</i>                  | TATGTACGCCCTGAGTTCC       | GCTCACTGCACGTTGTTGTT      |
| <i>Vim</i>                    | GCACCCTGCAGTCATTCAGA      | CTGCAAGGATTCCACTTTCCG     |
