# Supplementary material
Source: PubMed Central journal article supplement (PMC5690378)
Supplement: supp_fj.201700236R_Supplemental_Table2.pdf [file supp_fj.201700236R_Supplemental_Table2.pdf]

**Supplemental Table 2.** Binding energies of the best ligand-hIAPP complexes after docking calculations for PBA, Resveratrol and epigallocatechin gallate (EGCG).

|                   | <b>Cavity</b> | <b>Binding Energy of PBA (kcal/mol) Round0 / Round1</b> | <b>Binding Energy of Resveratrol (kcal/mol) Round0/Round1</b> | <b>Binding Energy of EGCG (kcal/mol) Round0/Round1</b> |
|-------------------|---------------|---------------------------------------------------------|---------------------------------------------------------------|--------------------------------------------------------|
| <b>Monomer 1</b>  | 0             | -3.6 / -3.4                                             | -4.0 / -3.6                                                   | -2.0 / 1.1                                             |
| <b>Monomer 2</b>  | 0             | -5.3 / -5.2                                             | -6.4 / -6.4                                                   | -6.5 / -6.4                                            |
| <b>Monomer 4</b>  | 0             | -3.7 / -3.7                                             | -4.2 / -4.3                                                   | -5.3 / -5.2                                            |
|                   | 1             | -3.8 / -3.8                                             | -3.2 / -3.3                                                   | 4.1 / 6.9                                              |
| <b>Dimer 1</b>    | 0             | -4.4 / -4.3                                             | -4.7 / -4.7                                                   | -4.5 / -4.5                                            |
| <b>Dimer 2</b>    | 0             | -4.8 / -4.9                                             | -4.3 / -4.4                                                   | -3.0 / -2.9                                            |
| <b>Dimer 3</b>    | 0             | -4.6 / -4.6                                             | -4.7 / -4.7                                                   | -5.6 / -5.6                                            |
| <b>Oligomer 1</b> | 0             | -5.6 / -5.6                                             | -7.1 / -7.1                                                   | -5.6 / -5.6                                            |
|                   | 1             | -5.9 / -5.9                                             | -6.7 / -6.7                                                   | -5.9 / -5.9                                            |
|                   | 2             | -6.5 / -6.5                                             | -7.3 / -7.4                                                   | -6.5 / -6.5                                            |
|                   | 3             | -6.0 / -6.0                                             | -5.8 / -5.8                                                   | -5.9 / -6.0                                            |
|                   | 5             | -5.7 / -5.7                                             | -6.3 / -6.3                                                   | -5.7 / -5.7                                            |
| <b>Oligomer 2</b> | 0             | -5.7 / -5.6                                             | -7.0 / -7.0                                                   | -5.6 / -5.6                                            |
|                   | 1             | -5.4 / -5.4                                             | -6.1 / -6.1                                                   | -5.6 / -5.7                                            |
|                   | 3             | -5.6 / -5.6                                             | -6.9 / -6.9                                                   | -5.8 / -5.8                                            |
|                   | 14            | -5.8 / -5.8                                             | -6.4 / -6.4                                                   | -5.4 / -5.4                                            |
